# Supplementary material
Source: PubMed Central journal article supplement (PMC7874332)

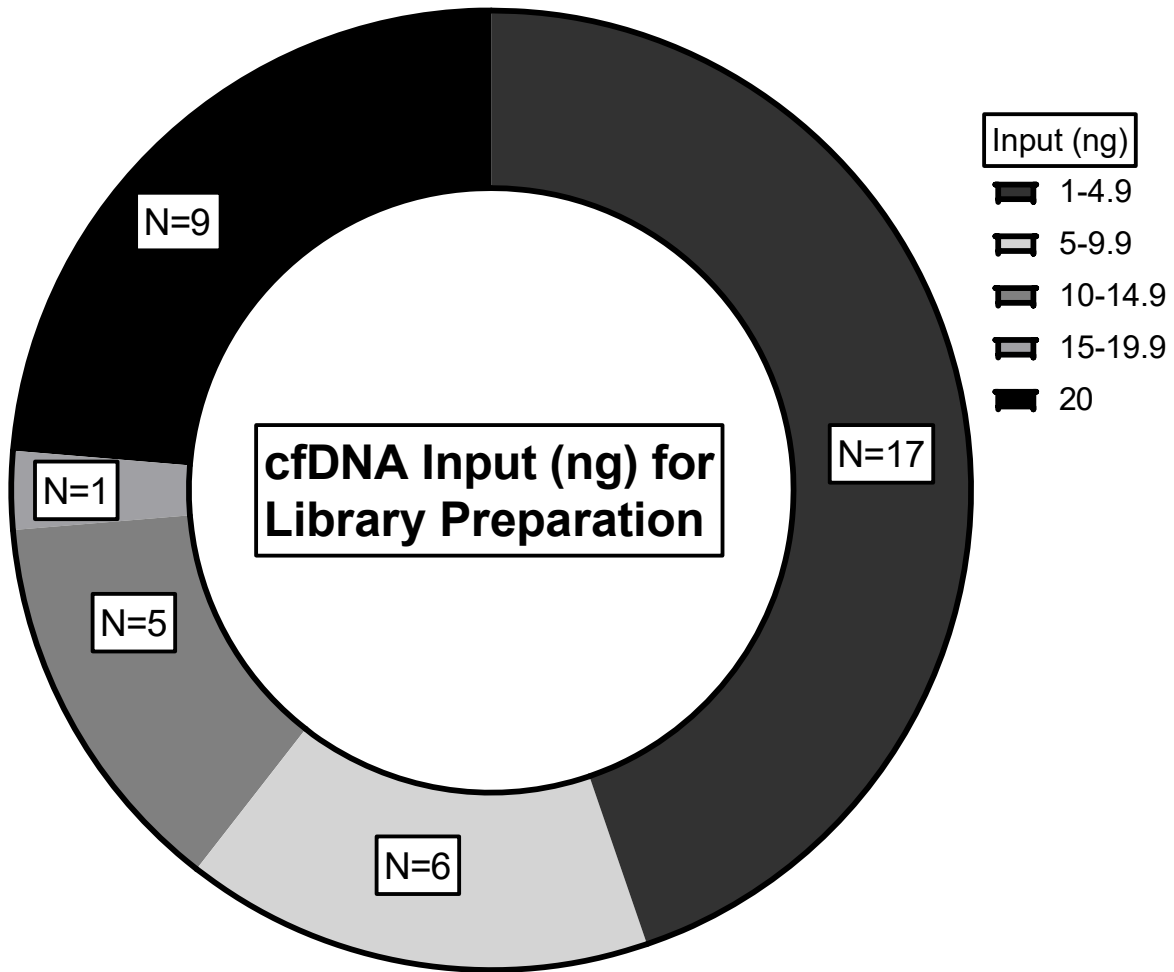

**Total=38**

Supplement: mmc1.pdf [file mmc1.pdf]
